## REVIEW

# The evolution and development of vertebrate lateral line electroreceptors

Clare V. H. Baker<sup>1,\*</sup>, Melinda S. Modrell<sup>1</sup> and J. Andrew Gillis<sup>1,2,†</sup>

<sup>1</sup>Department of Physiology, Development and Neuroscience, University of Cambridge, Cambridge CB2 3DY, UK and

<sup>2</sup>Marine Biological Laboratory, 7 MBL Street, Woods Hole, MA 02543, USA

\*Author for correspondence (cvhb1@cam.ac.uk)

†Present address: Department of Biology, Dalhousie University, 1355 Oxford Street, Halifax, NS, Canada, B3H 4R2

### Summary

Electroreception is an ancient vertebrate sense with a fascinating evolutionary history involving multiple losses as well as independent evolution at least twice within teleosts. We review the phylogenetic distribution of electroreception and the morphology and innervation of electroreceptors in different vertebrate groups. We summarise recent work from our laboratory that has confirmed the homology of ampullary electroreceptors in non-teleost jawed vertebrates by showing, in conjunction with previously published work, that these are derived embryonically from lateral line placodes. Finally, we review hypotheses to explain the distribution of electroreception within teleosts, including the hypothesis that teleost ampullary and tuberous electroreceptors evolved *via* the modification of mechanosensory hair cells in lateral line neuromasts. We conclude that further experimental work on teleost electroreceptor development is needed to test such hypotheses.

Key words: electroreception, electroreceptors, ampullary, tuberous, neuromast, hair cell, lateral line.

Received 30 October 2012; Accepted 4 March 2013

### The discovery of electroreception in weakly electric teleosts

The existence of strongly electric fishes, which use modified muscle cells in an ‘electric organ’ to generate electric shocks for defence and/or to stun prey, has been known for centuries (Zupanc and Bullock, 2005): they include electric rays (over 60 species, including the genus *Torpedo*, in the batoid group of cartilaginous fishes), electric catfishes (the family Malapteruridae, in the siluriform teleost group of ray-finned bony fishes) and the electric eel (*Electrophorus electricus*, a gymnotiform teleost). In contrast, it is only 60 years since Lissman’s discovery that the mormyriiform teleost *Gymnarchus niloticus* (the aba, or African knifefish) is weakly electric, i.e. uses a muscle-derived electric organ to generate a weak electric field, undetectable to us without amplification (Lissmann, 1951). The same paper also noted that the fish is sensitive to changes in the local electric field. Lissmann later described both electric organ discharges and electrolocation – the use of local distortions in the electric field to locate and identify objects – in *G. niloticus* as well as in other mormyriiform and gymnotiform teleost species (Lissmann, 1958; Lissmann and Machin, 1958). His seminal work identified a previously unrecognised vertebrate sense: electroreception.

Electric organs have evolved independently multiple times within teleosts (Alves-Gomes, 2001; Kawasaki, 2009; Lavoué et al., 2012). Mormyriiform and gymnotiform teleosts (Sullivan et al., 2000; Alves-Gomes, 2001; Lavoué and Sullivan, 2004; Kawasaki, 2009; Lavoué et al., 2012) are now known to use both passive electroreception (perception of low-frequency environmental electric fields) and active electroreception (perception of distortions in high-frequency self-generated electric fields) for electrolocation (von der Emde, 1999; Alves-Gomes, 2001; Caputi and Budelli, 2006; von der Emde, 2006). They also use high-frequency electroreception for social communication, including mate

recognition and selection, by detecting the electric organ discharges of other fish (Feulner et al., 2009; Kawasaki, 2009).

Two distinct types of electroreceptor organs mediate electroreception in both groups of weakly electric teleosts (Fig. 1A) (Gibbs, 2004; Jørgensen, 2005). ‘Ampullary’ organs detect low-frequency environmental electric fields (passive electroreception); they comprise relatively few electroreceptor cells (generally with short, sparse apical microvilli) in epithelia at the base of mucous-filled ducts, which open to the surface *via* pores (Gibbs, 2004; Bodznick and Montgomery, 2005; Jørgensen, 2005). ‘Tuberous’ organs of varying morphology detect high-frequency electric fields from electric organ discharges (self-generated and/or from other fish) for active electroreception; they lack ducts and are ‘plugged’ by loosely packed epidermal cells, with the electroreceptor cells (which generally have numerous apical microvilli) surrounded by an intraepidermal cavity (Gibbs, 2004; Bodznick and Montgomery, 2005; Jørgensen, 2005; Kawasaki, 2005). Teleost electroreceptors are distributed on both the head and trunk, and are part of the lateral line system; depending on their position, they are innervated by anterior (pre-otic) or posterior (post-otic) lateral line nerves, which project centrally to a special ‘electrosensory lateral line lobe’ in the medulla (Bullock et al., 1983; Gibbs, 2004; Bell and Maler, 2005; Bodznick and Montgomery, 2005). The anterior and posterior lateral line nerves also innervate the mechanosensory hair cells of lateral line neuromasts (Fig. 1B), which are distributed in characteristic lines over the head and trunk and detect local water movement (Bleckmann and Zelik, 2009). Neuromast hair cells have a single cilium (kinocilium) flanked by a ‘hair bundle’, i.e. a characteristically stepped array of microvilli (stereocilia) (Gillespie and Müller, 2009). The neurons in pre-otic and post-otic cranial lateral line ganglia that give rise to the anterior and posterior lateral line nerves, respectively, and the neuromasts innervated by these

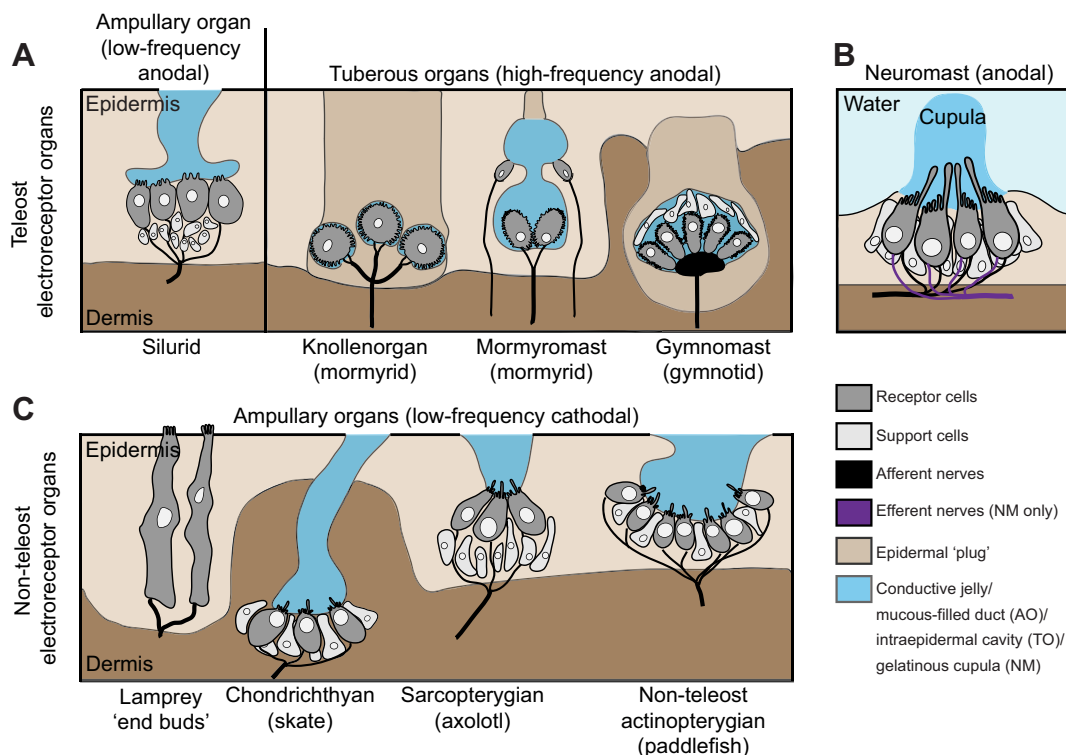

Fig. 1. Schematics illustrating the range of lateral line organ morphologies (not to scale). (A) Teleost ampullary organs, which respond to low-frequency anodal stimuli, contain electroreceptor cells with short, sparse microvilli, located at the base of mucous-filled ducts that open to the surface. A silurid example is shown (Northcutt et al., 2000). Tuberous organs, which respond to high-frequency anodal stimuli, are morphologically varied but the electroreceptor cells (which have many microvilli) are generally located within an intraepidermal cavity plugged by epidermal cells. Both types of mormyrid tuberous organs [knollenorgan and mormyromast (modified from Jørgensen, 2005)] and a gymnotid tuberous organ [gymnomast (modified from Cernuda-Cernuda and García-Fernández, 1996)] are shown. (B) Neuromast receptor cells, which are mechanosensory but can also respond to large anodal stimuli, have a single cilium flanked by a stepped array of microvilli (the 'hair bundle'). The cilia and hair bundles of all the receptor cells in the neuromast are encased together in a gelatinous cupula in contact with water. Unlike electroreceptors, which only receive afferent innervation, neuromast hair cells receive both afferent and efferent innervation. (C) Examples of non-teleost electroreceptor organs, which all respond to low-frequency cathodal stimuli: lamprey 'end buds' containing multiple electroreceptor cells, each with multiple microvilli but no cilia (modified from Jørgensen, 2005), and chondrichthyan (e.g. skate), sarcopterygian (e.g. axolotl) and non-teleost actinopterygian (e.g. paddlefish) ampullary organs, whose electroreceptor cells generally have a single cilium and variable numbers of microvilli. AO, ampullary organ; NM, neuromast; TO, tuberous organ.

nerves, are derived embryonically from lateral line placodes, i.e. paired patches of thickened neurogenic cranial ectoderm that elongate or migrate in characteristic lines over the head and trunk during embryonic development (Gibbs, 2004; Ghysen and Dambly-Chaudière, 2007; Ma and Raible, 2009; Sarrazin et al., 2010; Aman and Piotrowski, 2011).

### Electroreception is phylogenetically widespread amongst living vertebrates

After electroreception was discovered in weakly electric teleosts, it was found to be phylogenetically widespread amongst living vertebrates (Fig. 2A) (Bullock et al., 1983; New, 1997; Northcutt, 1997; Schlosser, 2002). Within the cyclostomes, i.e. the only surviving jawless fishes [which recent molecular analyses have confirmed to be a monophyletic group, sister to the living jawed vertebrates (e.g. Delsuc et al., 2006; Mallatt and Winchell, 2007; Heimberg et al., 2010)], there is no evidence for electroreception in hagfishes (Bullock et al., 1983; Braun and Northcutt, 1997). However, many ancestral characters have been lost within the hagfish lineage (e.g. Wicht and Northcutt, 1995; Ota et al., 2011). The lateral line system of eptatretid hagfish (Kishida et al., 1987; Wicht and Northcutt, 1995; Braun and Northcutt, 1997) has been characterised as secondarily simplified (Braun and Northcutt,

1997), while myxinoid hagfishes have lost the lateral line system altogether (Braun and Northcutt, 1997). In contrast, lampreys have mechanosensory lateral line neuromasts, which have been shown to be functional at larval stages (Gelman et al., 2007), as well as epidermal 'end bud' electroreceptor organs (Fig. 1C) on both head and trunk, containing up to 30 receptor cells, each with 80–90 apical microvilli (Bodznick and Northcutt, 1981; Jørgensen, 2005). Lamprey end buds respond to weak cathodal stimuli, i.e. negative potential relative to the interior of the animal (Bodznick and Preston, 1983), and are innervated by the anterior lateral line nerve (a recurrent branch of which innervates the end buds on the trunk), which projects to a dorsal octavolateral nucleus in the medulla (Bodznick and Northcutt, 1981; Bodznick and Preston, 1983; Ronan and Bodznick, 1986).

Within the jawed vertebrates (gnathostomes), electrosensory 'ampullary organs' are found in all cartilaginous fishes (chondrichthyans), i.e. sharks, batoids (rays, skates) and holocephalans, and in some lineages of non-teleost bony fishes (osteichthyans), both in the lobe-finned (sarcopterygian) clade – coelacanths, lungfishes, salamanders and caecilians – and in the ray-finned (actinopterygian) clade – bichirs, paddlefishes and sturgeons (Bullock et al., 1983; Northcutt and Bemis, 1993; New, 1997; Northcutt, 1997; Schlosser, 2002). Ampullary organs are so

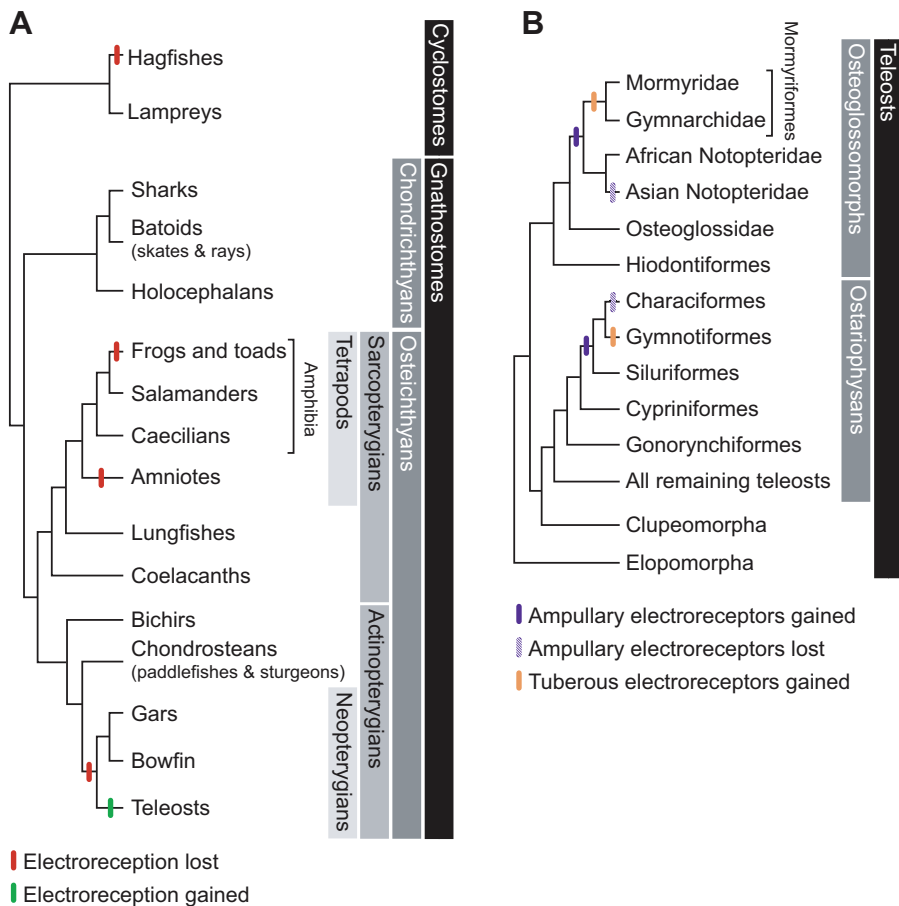

Fig. 2. The phylogenetic distribution of electroreception among (A) vertebrates and (B) teleost fishes. Neopterygian and teleost phylogenies drawn after Near et al. (Near et al., 2012). (A) The distribution of electroreception among the vertebrates reveals it to be an ancient sense that was lost independently (red bar) in various lineages, including the lineage leading to neopterygian fishes (gars, bowfin and teleosts). Electroreception subsequently evolved independently within the teleosts (green bar). (B) The distribution of electroreception among teleost fishes suggests that ampullary electroreceptors (blue bar) evolved independently twice: once in the Osteoglossomorpha, along the lineage leading to notopterids and mormyrimorphs (with subsequent loss in Asian notopterids); and once in the Ostariophysi, along the lineage leading to siluriforms, gymnotiforms and characiforms (Near et al., 2012) (with subsequent loss in characiforms). Electric organs and tuberous electroreceptors (brown bar) subsequently evolved independently in mormyrimorphs within the Osteoglossomorpha, and in gymnotiforms within the Ostariophysi. Alternative hypotheses are discussed in the text (see section titled 'Electroreception evolved independently at least twice within teleosts').

called because of their flask-like morphology (Fig. 1C), with a sensory epithelium at the base of an electrically conductive jelly-filled duct that opens to the surface *via* a pore (Jørgensen, 2005). The sensory epithelium contains supporting cells and electroreceptors with an apical kinocilium and variable numbers of apical microvilli (Jørgensen, 2005). Given their morphology, ampullary electroreceptors are sometimes described as modified hair cells, although they lack the hair bundle of stepped microvilli characteristic of mechanosensory hair cells (Gillespie and Müller, 2009).

Like lamprey end buds, non-teleost ampullary electroreceptors are excited by weak cathodal stimuli, which are thought to open voltage-gated  $\text{Ca}^{2+}$  channels in the apical membrane (Teeter et al., 1980; Münz et al., 1984; Lu and Fishman, 1995; Bodznick and Montgomery, 2005), and they are innervated by the anterior lateral line nerve, which projects to a dorsal octavolateral nucleus in the medulla (Bullock et al., 1983; Bell and Maler, 2005). In all non-teleost jawed vertebrates except lungfishes, ampullary organs are confined to the head; trunk ampullary organs in lungfishes, like trunk end buds in lampreys, are nevertheless innervated by a recurrent branch of the anterior lateral line nerve (Northcutt, 1986). Although lamprey end buds and non-teleost jawed vertebrate ampullary organs are morphologically different, their similarities – response to cathodal stimuli, innervation by the anterior lateral line nerve projecting to a dorsal octavolateral nucleus in the medulla – are so striking that they have long been assumed to be homologous, i.e. to have been inherited from the common ancestor of lampreys and jawed vertebrates (Bullock et al., 1983). [Note: although monotreme mammals (Pettigrew, 1999) and dolphins (Czech-Damal et al., 2012) independently evolved electroreception *via*

modified trigeminal nerve endings in the snout, this is entirely separate from ancestral lateral line-mediated electroreception, which was lost (together with the entire lateral line system) in the amniote ancestor. The trigeminal electroreceptive system will not be considered further here.]

#### Non-teleost ampullary organs develop from lateral line placodes

A key test of the hypothesis that all non-teleost electroreceptors are homologous is to show experimentally that these organs share a common embryonic origin. Unfortunately, the embryonic origin of lamprey electroreceptors is currently unknown. In larval lampreys [ammocoetes; ~70 days post-fertilisation (Richardson and Wright, 2003)], the mechanosensory lateral line system is functional (Gelman et al., 2007) and the larvae respond to weak cathodal electric fields (Ronan, 1988). However, the end bud organs found in adult lampreys are not present in larval lampreys and newly metamorphosed adults; instead, the electroreceptors at these stages are thought to be cells with multiple microvilli ('microvillous cells') found scattered in the epidermis of the branchial region and tail, which closely resemble the electroreceptor cells found in adult end buds (Whitaker and Lane, 1983; Ronan, 1988; Jørgensen, 2005) and which seem to be innervated by lateral line nerves (Steven, 1951). As far as we are aware, neither neuromasts nor electroreceptors have been described during embryonic stages in the lamprey, although preliminary data from vital dye staining with FM 1-43, a fluorescent styryl dye taken up by mechanosensory hair cells (Nishikawa and Sasaki, 1996), suggest that neuromasts may be present by 20 days post-fertilisation in the sea lamprey, *Petromyzon marinus* (M.S.M., unpublished data). Experimental investigation of the embryonic origin of lamprey

electroreceptors is needed to test further the hypothesis that all non-teleost ampullary electroreceptors are homologous. However, in conjunction with previously published work (Northcutt et al., 1995), we were recently able to confirm the homology of ampullary organs in all non-teleost jawed vertebrates, by showing that lateral line placodes give rise to ampullary organs in representatives of both the lobe-finned and ray-finned bony fish clades (Northcutt et al., 1995; Modrell et al., 2011a) and the cartilaginous fish clade (Gillis et al., 2012).

The first experimental data on the embryonic origin of non-teleost ampullary organs came from ablation and fate-mapping studies (performed by grafting tissue from pigmented wild-type embryos to albino host embryos) undertaken more than 15 years ago in a salamander, the Mexican axolotl, *Ambystoma mexicanum* (a tetrapod, i.e. a derivative of the lobe-finned bony fish lineage) (Northcutt et al., 1995). This work built on an earlier descriptive study of axolotl lateral line organ development, which suggested that neuromasts differentiate within the central ridge of a given elongating lateral line primordium, and that ampullary organs differentiate later, from the flanks of the same elongating primordium (Northcutt et al., 1994). Before elongating, the lateral line placode also gives rise to the neurons that will innervate the neuromasts and ampullary organs arising from that placode (Northcutt et al., 1994). The subsequent experimental study demonstrated conclusively that individual lateral line placodes give rise to both ampullary organs and neuromasts in the axolotl (Northcutt et al., 1995).

More recently, we investigated lateral line placode development in embryos of a basal ray-finned fish, the North American (Mississippi) paddlefish, *Polyodon spathula* (Fig. 3A) (Modrell et al., 2011a). We had previously shown that *Sox3*, which encodes a member of the SoxB1 family of HMG domain transcription factors that is expressed in lateral line placodes and elongating lateral line primordia in the frog *Xenopus* (Schlosser and Ahrens, 2004), is also expressed in paddlefish lateral line placodes, neuromasts and ampullary organs (Modrell et al., 2011b). We found that parvalbumin-3 (Pv3), a  $\text{Ca}^{2+}$ -binding protein that is thought to be the major  $\text{Ca}^{2+}$  buffer in mechanosensory hair cells of the inner ear and lateral line (Heller et al., 2002), is expressed in paddlefish electroreceptors as well as neuromast hair cells (Fig. 3B) (Modrell et al., 2011a). We later found that Pv3 is also expressed in electroreceptors and neuromast hair cells in the axolotl (Modrell and Baker, 2012). The transcription co-factor gene *Eya4*, which we had previously shown to be specifically expressed in lateral line (and otic) placodes, neuromasts and ampullary organs in a shark, *Scyliorhinus canicula* (O'Neill et al., 2007), similarly proved to be expressed in lateral line (and otic) placodes, neuromasts and ampullary organs in the paddlefish (Fig. 3C–F) (Modrell et al., 2011a). We later found similar expression of *Eya4* in the axolotl (Modrell and Baker, 2012). Other *Eya* family genes, as well as *Six1/2* and *Six4/5* family transcription factor genes, were also expressed in multiple neurogenic placodes in paddlefish (including lateral line placodes), as well as in neuromasts and ampullary organs (Modrell et al., 2011a).

These gene expression data were consistent with a lateral line placode origin for paddlefish ampullary organs and neuromasts. However, gene expression data cannot prove cell lineage, as the same gene could easily be expressed in cells of different lineages. Hence, we used focal injections of the vital lipophilic dye DiI to label individual lateral line placodes in paddlefish embryos (Fig. 3G) (Modrell et al., 2011a). At later stages, DiI could be detected in ampullary organs, as well as in neuromasts and lateral

line ganglia (Fig. 3H–J) (Modrell et al., 2011a). Taken together with the previously published experimental data on the lateral line placode origin of ampullary organs in the axolotl (Northcutt et al., 1995), this work confirmed that ampullary organs are primitively lateral line placode-derived in bony fishes (Modrell et al., 2011a).

As described above, the homology of ampullary organs in bony and cartilaginous fishes is supported by several lines of evidence, primarily their response to cathodal stimuli and innervation by the anterior lateral line nerve projecting to a dorsal octavolateral nucleus in the medulla [to which we could also add expression of *Eya4* (O'Neill et al., 2007; Modrell et al., 2011a; Modrell and Baker, 2012)]. However, a descriptive study in the shark *S. canicula* had cast doubt on this assumed homology by suggesting that shark ampullary organs arise from neural crest cells (Freitas et al., 2006). Neural crest cells originate at the border of the neural plate, like neurogenic placodes, but they are a distinct cell population (see Schlosser, 2008). The proposed neural crest origin for shark electroreceptors (Freitas et al., 2006) was based on expression of the *SoxE* gene family member *Sox8*, which is not neural crest-specific, and cross-reaction with the HNK1 antibody, which recognises migrating neural crest cells (and other cell types) in some, but not all vertebrates [and which does not cross-react with neural crest cells in a related shark species, *S. torazame* (Kuratani and Horigome, 2000)].

We recently investigated lateral line placode development in another cartilaginous fish, the little skate, *Leucoraja erinacea* (Fig. 4) (Gillis et al., 2012). We found that Pv3 is expressed in skate neuromast hair cells and electroreceptors (Fig. 4A–C) (Gillis et al., 2012), just as in paddlefish (Fig. 3B) (Modrell et al., 2011a) and axolotl (Modrell and Baker, 2012), suggesting that Pv3 acts as a  $\text{Ca}^{2+}$  buffer for electroreceptors and mechanosensory hair cells in all jawed vertebrates. As expected from our previous data in shark (O'Neill et al., 2007), skate lateral line (and otic) placodes expressed *Eya4* (Fig. 4D,E) (Gillis et al., 2012), while co-labelling with Pv3 at later stages showed that *Eya4* was maintained specifically in electroreceptors within ampullary organs, and hair cells within neuromasts (Fig. 4F–G') (Gillis et al., 2012). Crucially, in the first long-term *in vivo* fate-mapping study reported in any cartilaginous fish, we used the same focal DiI labelling approach as in the paddlefish to show that lateral line placodes give rise to ampullary organs and neuromasts in the skate (Fig. 4H–K) (Gillis et al., 2012). Taken together with the previous fate-mapping studies in the axolotl (Northcutt et al., 1995) and paddlefish (Modrell et al., 2011a), these data show that lateral line placodes give rise to ampullary organs (and neuromasts) in all jawed vertebrates. Overall, we can infer from these various studies (Northcutt et al., 1995; Modrell et al., 2011a; Modrell and Baker, 2012; Gillis et al., 2012) that the common ancestor of all jawed vertebrates [which a recent study suggests was more shark-like than previously thought (Davis et al., 2012)] possessed a lateral line placode-derived system of electrosensory ampullary organs and mechanosensory neuromasts, which expressed *Eya4* and most likely used Pv3 as a  $\text{Ca}^{2+}$  buffer.

#### Electroreception evolved independently at least twice within teleosts

Within the jawed vertebrates, electroreception was independently lost in the lineages leading to frogs, amniotes and the neopterygian fishes, i.e. holosteans (gars, bowfin) and teleosts (Fig. 2A) (Bullock et al., 1983; New, 1997; Northcutt, 1997; Schlosser, 2002). Within teleosts, electroreception has evolved independently at least twice (Fig. 2B) (Bullock et al., 1983; New, 1997; Northcutt, 1997;



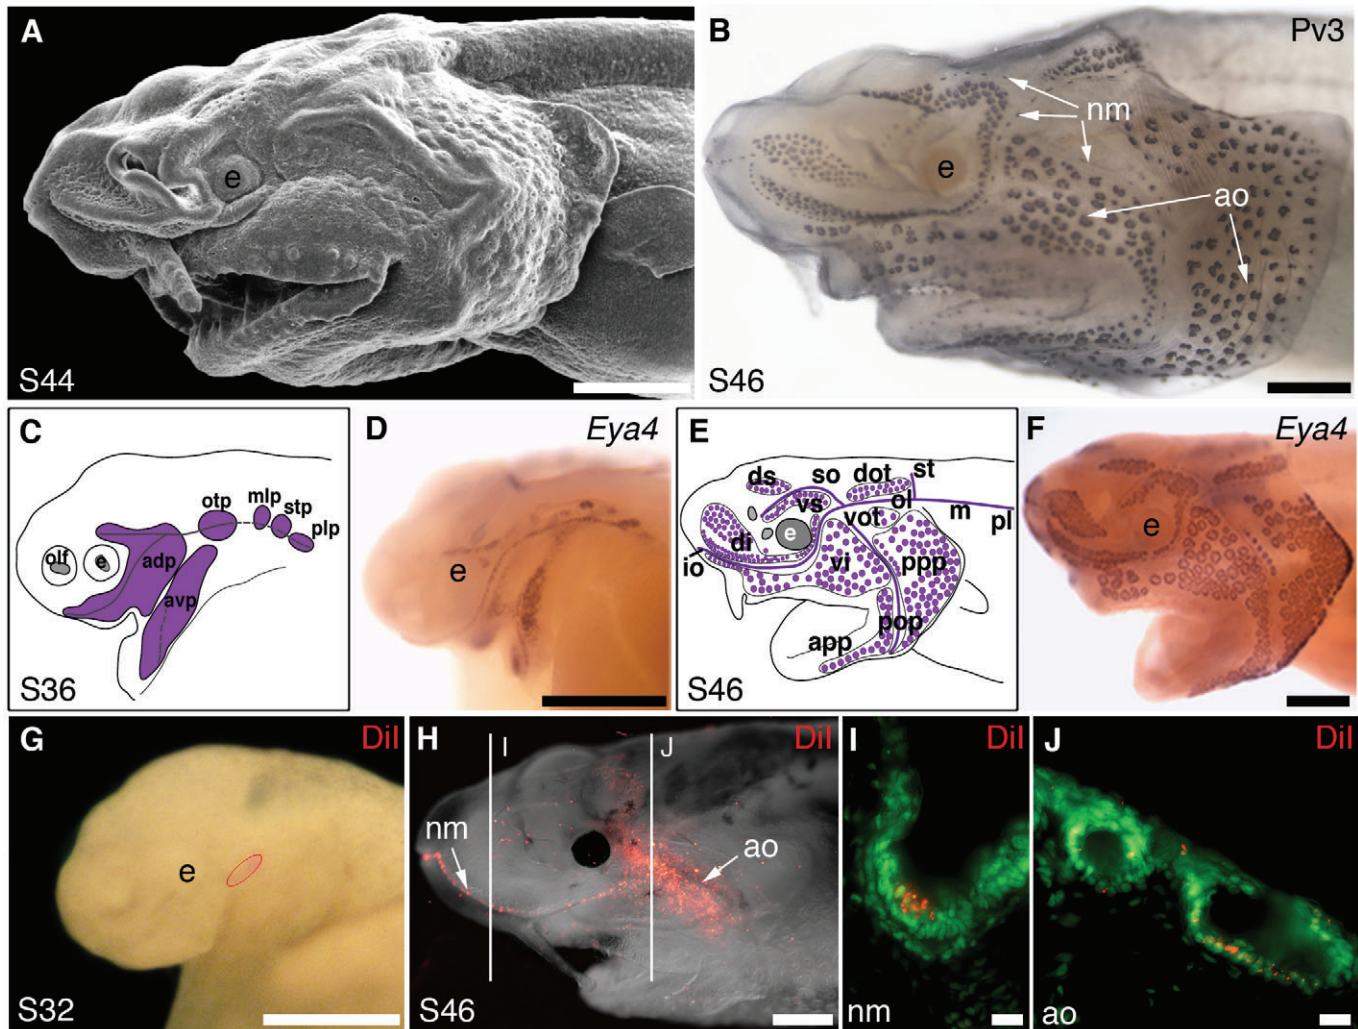

Fig. 3. Lateral line placodes give rise to ampullary organs and neuromasts in a basal ray-finned bony fish, the North American (Mississippi) paddlefish, *Polyodon spathula*. Lateral views, anterior to the left, unless otherwise noted; staging according to Bemis and Grande (Bemis and Grande, 1992). All panels were previously published (Modrell et al., 2011a) and are reproduced here in accordance with the terms of the authors' Licence to Publish agreement with Nature Publishing Group. (A) Scanning electron micrograph of a stage 44 embryo showing differentiated ampullary organ fields, particularly on the operculum. (B) Stage 46 embryo immunostained for the  $\text{Ca}^{2+}$ -binding protein parvalbumin-3 (Pv3), which is strongly expressed in the sensory receptor cells of both neuromasts and ampullary organs (see also Modrell et al., 2011a). (C–F) Schematic diagrams and whole-mount *in situ* hybridisation for the transcription co-factor gene *Eya4* at (C,D) stage 36, when *Eya4* is expressed in developing neuromast canal lines and the ampullary organ fields flanking those lines (purple in C) and (E,F) stage 46, when *Eya4* expression is maintained in both neuromasts and ampullary organs (purple in E). (G) Stage 32 embryo immediately following a focal injection of the lipophilic vital dye Dil into the anterodorsal lateral line placode (injection site outlined in red). (H) The same embryo as in G, at stage 46. Dil-labelled cells are visible both in a neuromast canal line and ampullary organ fields. Lines indicate the plane of transverse sections showing Dil-labelled cells (red) in (I) a neuromast and (J) ampullary organs, both counterstained with the nuclear marker Sytox Green (green). Abbreviations: adp, anterodorsal placode; ao, ampullary organ; app, anterior preopercular ampullary field; avp, anteroventral placode; dot, dorsal otic ampullary field; di, dorsal infraorbital ampullary field; ds, dorsal supraorbital ampullary field; e, eye; io, infraorbital lateral line; m, middle lateral line; mlp, middle lateral line placode; ol, otic lateral line; otp, otic lateral line placode; plp, posterior lateral line placode; pl, posterior lateral line; pop, preopercular lateral line; ppp, posterior preopercular field; S, stage; stp, supratemporal placode; so, supraorbital lateral line; st, supratemporal lateral line; vi, ventral infraorbital field; vot, ventral otic field; vs, ventral supraorbital field. Scale bars: (A,B,D,G) 0.5 mm, (F,H) 1 mm, (I,J) 10  $\mu\text{m}$ .

Sullivan et al., 2000; Alves-Gomes, 2001; Lavoué and Sullivan, 2004; Kawasaki, 2009; Lavoué et al., 2012). Here, we review hypotheses for the evolution of teleost electroreceptors in light of the most recently published phylogeny of the ray-finned fishes (Near et al., 2012).

We consider the most parsimonious interpretation of the distribution of electroreception across teleosts to be that ampullary electroreceptors evolved independently twice, once in the Osteoglossomorpha and once in the Ostariophysi, with subsequent loss in some lineages, and evolution of electric organs and tuberous

electroreceptors in a subset of the lineages retaining ampullary electroreceptors (Fig. 2B). On this interpretation, in the Osteoglossomorpha, ampullary electroreceptors evolved along the stem leading to the common ancestor of notopterids and mormyriforms (i.e. mormyrids and gymnarichids), with subsequent loss in the Asian notopterid lineage (Lavoué and Sullivan, 2004; Lavoué et al., 2012). An electric organ and tuberous electroreceptors subsequently evolved along the lineage leading to the mormyriforms. An alternative hypothesis is that ampullary electroreceptors, electric organs and tuberous electroreceptors

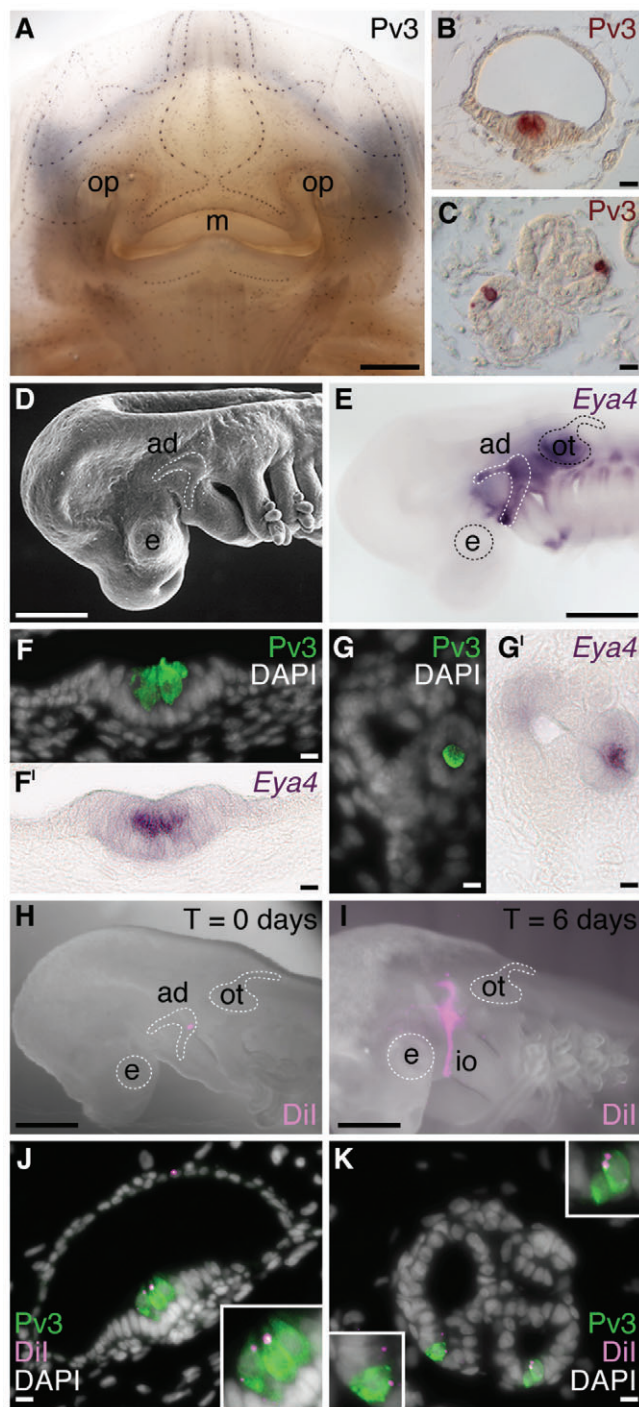

Fig. 4. Lateral line placodes give rise to ampullary organs and neuromasts in a cartilaginous fish, the little skate, *Leucoraja erinacea*. All panels except E, H and I were previously published (Gillis et al., 2012). (A) Whole-mount immunostaining for the  $\text{Ca}^{2+}$ -binding protein parvalbumin-3 (Pv3) in an *L. erinacea* embryo at stage 33 (Maxwell et al., 2008) reveals superficial lines of cephalic mechanosensory neuromasts, as well as clusters of ampullary organs located deeper within the dermis. Immunohistochemical localisation of Pv3 in (B) neuromasts and (C) ampullary organs reveals small clusters of Pv3-positive sensory receptor cells nested among Pv3-negative supporting cells. To test the hypothesis that lateral line placodes give rise to neuromasts and ampullary organs, we fate-mapped the anterodorsal lateral line placode in *L. erinacea*, which is recognisable (D) as a horseshoe-shaped thickening of cranial ectoderm caudal to the eye and dorsal to the mandibular arch, and (E) by its expression of the transcription co-factor gene *Eya4*. *Eya4* expression is maintained at later stages in the Pv3-positive sensory receptor cells of (F,F') neuromasts and (G,G') ampullary organs. (H) Example of an embryo immediately after focal labelling of the anterodorsal lateral line placode with the lipophilic vital dye Dil. (I) After 6 days of incubation, Dil-positive cells were observed migrating away from the placode, in the infraorbital sensory primordium. In embryos with Dil-labelled anterodorsal lateral line placodes, sensory receptor cells, support cells and canal cells of (J) neuromasts and (K) ampullary organs were Dil-positive, indicating their lateral line placodal origin. Abbreviations: ad, anterodorsal lateral line placode; e, eye; io, infraorbital sensory primordium; m, mouth; op, olfactory pit; ot, otic vesicle. Scale bars: (A) 2.5 mm, (B,C,F–G',J,K) 10  $\mu\text{m}$ , (D,E,H) 0.5 mm, (I) 0.4 mm.

2012) (but see Lavoué et al., 2012). If this is correct, then ampullary electroreceptors must have been lost in characiforms [also supported by Lavoué et al. (Lavoué et al., 2012)]. Alternatively, ampullary electroreceptors, electric organs and tuberous electroreceptors may have evolved along the lineage leading to gymnotiforms, with ampullary organs evolving independently in siluriforms.

Regardless of how many times ampullary electroreceptors evolved within the teleosts, it is clear that they are not homologous with non-teleost ampullary electroreceptors, as teleost ampullary electroreceptors are all excited by anodal stimuli (i.e. those which make the exterior of the animal positive with respect to the interior), rather than cathodal stimuli as in all non-teleosts, and the voltage sensor is the basal membrane, rather than the apical membrane (Bodznick and Montgomery, 2005). It has been proposed that teleost ampullary electroreceptors independently evolved in both Osteoglossomorpha and Ostariophysi via the modification of mechanosensory lateral line neuromast hair cells, which seems plausible given that neurotransmitter release is triggered in mechanosensory hair cells by the opening of voltage-gated  $\text{Ca}^{2+}$  channels in the basal membrane (Bullock et al., 1983; Bodznick and Montgomery, 2005). This hypothesis is also supported by the fact that lateral line mechanosensory hair cells, like teleost electroreceptors, are excited by anodal stimuli, although they are two to three orders of magnitude less sensitive than electroreceptors (Murray, 1956; Bodznick and Preston, 1983; Bullock et al., 1983; Münz et al., 1984; Tong and Bullock, 1984; Baumann and Roth, 1986; Barry et al., 1988). It is perhaps also suggestive that the ampullary electroreceptors of the notopterid *Xenomystus nigri* (African knifefish, in the sister group to the mormyriforms; Fig. 2B) have an apical kinocilium as well as microvilli (Jørgensen, 2005). The different types of tuberous electroreceptors, in contrast, could have evolved independently within the two weakly electric teleost groups (i.e. mormyriforms within the Osteoglossomorpha, and gymnotiforms within the Ostariophysi) either as a specialisation of ampullary electroreceptors, or via a second independent modification of neuromast hair cells.

evolved in mormyriforms, and that ampullary electroreceptors evolved independently in the African lineage of Notopteridae (Alves-Gomes, 2001).

Within the Ostariophysi, it has usually been proposed that ampullary electroreceptors evolved along the lineage leading to siluriforms (catfishes) and gymnotiforms, with an electric organ and tuberous electroreceptors subsequently evolving in gymnotiforms (Bullock et al., 1983; New, 1997; Northcutt, 1997; Sullivan et al., 2000; Alves-Gomes, 2001; Lavoué and Sullivan, 2004; Kawasaki, 2009; Lavoué et al., 2012). The most recent ray-finned fish phylogeny supports siluriforms as the sister group to a clade containing both gymnotiforms and characiforms (Near et al.,



Currently, there is no experimental evidence to support any of these hypotheses. If teleost electroreceptors (ampullary and/or tuberous) evolved *via* the modification of neuromast hair cells, then they must be derived from lateral line placodes. However, their embryonic origin currently remains unclear (Northcutt, 2005). It has been suggested that ampullary electroreceptors in siluriforms (catfishes) and both ampullary and tuberous electroreceptors in gymnotiforms are induced to form in local surface ectoderm by lateral line nerves (Vischer et al., 1989; Roth, 2003). However, gymnotiform tuberous electroreceptors can develop in the absence of innervation (Bensouilah and Denizot, 1994; Weisleder et al., 1994; Weisleder et al., 1996). Furthermore, siluriform ampullary electroreceptors initially develop in the lateral zones of lateral line placode-derived sensory primordia, flanking the lines of differentiating neuromasts (Northcutt, 2003), just like lateral line placode-derived ampullary organs in non-teleosts (Northcutt et al., 1995; Modrell et al., 2011a). Similarly, in the gymnotiform *Eigenmannia*, the first electroreceptor primordia appear on the lateral edges of the neuromast lines, several days after the first appearance of neuromasts (Vischer, 1989), which would also be consistent with their origin from the flanks of a lateral line primordium. As noted by Northcutt (Northcutt, 2005), apart from the posterior lateral line placode, which migrates down the trunk (e.g. Haas and Gilmour, 2006), lateral line placodes in teleosts could not be identified before the introduction of molecular markers such as *Eya1* (Sahly et al., 1999). Posterior lateral line placode migration and development is being intensively studied in the zebrafish *Danio rerio* (Ghysen and Dambly-Chaudière, 2007; Ma and Raible, 2009; Sarrazin et al., 2010; Aman and Piotrowski, 2011). This cypriniform species is the standard laboratory model for teleost developmental biology; however, cypriniforms lack electroreceptors (Fig. 2B). Overall, we conclude that hypotheses about teleost electroreceptor evolution cannot be tested until further experimental work, ideally involving *in vivo* fate mapping, is undertaken to determine the embryonic origins and molecular characteristics of ampullary and tuberous electroreceptors in representatives of the different electroreceptive teleost groups.

### Outlook

The massive reduction in cost of next-generation transcriptome sequencing ['RNA-Seq' (Wang et al., 2009)] has transformed molecular approaches to species without a sequenced genome, while the ability to perform targeted mutagenesis using custom-designed transcription activator-like effector nucleases (TALENs) (reviewed in Joung and Sander, 2013) seems set to herald a revolution in evolutionary developmental biology. As we move into the seventh decade of research into electroreception, the prospects are very bright for a much deeper understanding of the mechanisms underlying electroreceptor development in multiple vertebrate taxa, and hence for our understanding of electroreceptor evolution.

### Acknowledgements

The scanning electron micrograph in Fig. 2 (from Modrell et al., 2011a) was produced by Glenn Northcutt and Willy Bemis. The scanning electron micrograph in Fig. 3 (from Gillis et al., 2012) was produced by Glenn Northcutt, Ken Catania and Carl Luer.

### Author contributions

C.V.H.B. wrote the manuscript, with assistance from M.S.M. and J.A.G. M.S.M. performed all paddlefish experiments and generated Figs 1 and 3. J.A.G. performed all skate experiments and generated Figs 2 and 4.

### Competing interests

No competing interests declared.

### Funding

The work of M.S.M. on paddlefish embryos was funded by the Biotechnology and Biological Sciences Research Council (BB/F00818X/1 to C.V.H.B.). The work of J.A.G. on skate embryos was funded by a Royal Society Newton International Fellowship (to J.A.G.), Marine Biological Laboratory Spiegel and Colwin Endowed Summer Research Fellowships (to J.A.G.) and the Biotechnology and Biological Sciences Research Council (BB/F00818X/1 to C.V.H.B.).

### References

- Alves-Gomes, J. A. (2001). The evolution of electroreception and bioelectrogenesis in teleost fish: a phylogenetic perspective. *J. Fish Biol.* **58**, 1489-1511.
- Aman, A. and Piotrowski, T. (2011). Cell-cell signaling interactions coordinate multiple cell behaviors that drive morphogenesis of the lateral line. *Cell Adhes. Migr.* **5**, 499-508.
- Barry, M. A., White, R. L. and Bennett, M. V. (1988). The elasmobranch spiracular organ. II. Physiological studies. *J. Comp. Physiol. A* **163**, 93-98.
- Baumann, M. and Roth, A. (1986). The Ca<sup>2+</sup> permeability of the apical membrane of neuromast hair cells. *J. Comp. Physiol. A* **158**, 681-688.
- Bell, C. C. and Maler, L. (2005). Central neuroanatomy of electrosensory systems in fish. In *Electroreception* (ed. T. H. Bullock, C. D. Hopkins, A. N. Popper and R. R. Fay), pp. 68-111. New York, NY: Springer.
- Bemis, W. E. and Grande, L. (1992). Early development of the actinopterygian head. I. External development and staging of the paddlefish *Polyodon spathula*. *J. Morphol.* **213**, 47-83.
- Bensouilah, M. and Denizot, J. P. (1994). Formation of new sensory cells in deafferented tuberous organs of the gymnotid fish *Eigenmannia virescens*. *J. Neurosci. Res.* **39**, 545-555.
- Bleckmann, H. and Zelick, R. (2009). Lateral line system of fish. *Integr. Zool.* **4**, 13-25.
- Bodznick, D. and Montgomery, J. C. (2005). The physiology of low-frequency electrosensory systems. In *Electroreception* (ed. T. H. Bullock, C. D. Hopkins, A. N. Popper and R. R. Fay), pp. 132-153. New York, NY: Springer.
- Bodznick, D. and Northcutt, R. G. (1981). Electroreception in lampreys: evidence that the earliest vertebrates were electroreceptive. *Science* **212**, 465-467.
- Bodznick, D. and Preston, D. G. (1983). Physiological characterization of electroreceptors in the lampreys *Ichthyomyzon unicuspis* and *Petromyzon marinus*. *J. Comp. Physiol. A* **152**, 209-217.
- Braun, C. B. and Northcutt, R. G. (1997). The lateral line system of hagfishes (Craniata: Myxinoidea). *Acta Zool.* **78**, 247-268.
- Bullock, T. H., Bodznick, D. A. and Northcutt, R. G. (1983). The phylogenetic distribution of electroreception: evidence for convergent evolution of a primitive vertebrate sense modality. *Brain Res.* **287**, 25-46.
- Caputi, A. A. and Budelli, R. (2006). Peripheral electrosensory imaging by weakly electric fish. *J. Comp. Physiol. A* **192**, 587-600.
- Cernuda-Cernuda, R. and García-Fernández, J. M. (1996). Structural diversity of the ordinary and specialized lateral line organs. *Microsc. Res. Tech.* **34**, 302-312.
- Czech-Damal, N. U., Liebschner, A., Miersch, L., Klauer, G., Hanke, F. D., Marshall, C., Dehnhardt, G. and Hanke, W. (2012). Electroreception in the Guiana dolphin (*Sotalia guianensis*). *Proc. Biol. Sci.* **279**, 663-668.
- Davis, S. P., Finarelli, J. A. and Coates, M. I. (2012). Acanthodes and shark-like conditions in the last common ancestor of modern gnathostomes. *Nature* **486**, 247-250.
- Delsuc, F., Brinkmann, H., Chourrout, D. and Philippe, H. (2006). Tunicates and not cephalochordates are the closest living relatives of vertebrates. *Nature* **439**, 965-968.
- Feulner, P. G., Plath, M., Engelmann, J., Kirschbaum, F. and Tiedemann, R. (2009). Electrifying love: electric fish use species-specific discharge for mate recognition. *Biol. Lett.* **5**, 225-228.
- Freitas, R., Zhang, G., Albert, J. S., Evans, D. H. and Cohn, M. J. (2006). Developmental origin of shark electrosensory organs. *Evol. Dev.* **8**, 74-80.
- Gelman, S., Ayali, A., Tytell, E. D. and Cohen, A. H. (2007). Larval lampreys possess a functional lateral line system. *J. Comp. Physiol. A* **193**, 271-277.
- Ghysen, A. and Dambly-Chaudière, C. (2007). The lateral line microcosmos. *Genes Dev.* **21**, 2118-2130.
- Gibbs, M. A. (2004). Lateral line receptors: where do they come from developmentally and where is our research going? *Brain Behav. Evol.* **64**, 163-181.
- Gillespie, P. G. and Müller, U. (2009). Mechanotransduction by hair cells: models, molecules, and mechanisms. *Cell* **139**, 33-44.
- Gillis, J. A., Modrell, M. S., Northcutt, R. G., Catania, K. C., Luer, C. A. and Baker, C. V. H. (2012). Electrosensory ampullary organs are derived from lateral line placodes in cartilaginous fishes. *Development* **139**, 3142-3146.
- Haas, P. and Gilmour, D. (2006). Chemokine signaling mediates self-organizing tissue migration in the zebrafish lateral line. *Dev. Cell* **10**, 673-680.
- Heimberg, A. M., Cowper-Sal-lari, R., Sémon, M., Donoghue, P. C. and Peterson, K. J. (2010). microRNAs reveal the interrelationships of hagfish, lampreys, and gnathostomes and the nature of the ancestral vertebrate. *Proc. Natl. Acad. Sci. USA* **107**, 19379-19383.
- Heller, S., Bell, A. M., Denis, C. S., Choe, Y. and Hudspeth, A. J. (2002). Parvalbumin 3 is an abundant Ca<sup>2+</sup> buffer in hair cells. *J. Assoc. Res. Otolaryngol.* **3**, 488-498.
- Jørgensen, J. M. (2005). Morphology of electroreceptive sensory organs. In *Electroreception* (ed. T. H. Bullock, C. D. Hopkins, A. N. Popper and R. R. Fay), pp. 47-67. New York, NY: Springer.
- Joung, J. K. and Sander, J. D. (2013). TALENs: a widely applicable technology for targeted genome editing. *Nat. Rev. Mol. Cell Biol.* **14**, 49-55.

- Kawasaki, M. (2005). Physiology of tuberous electrosensory systems. In *Electroreception* (ed. T. H. Bullock, C. D. Hopkins, A. N. Popper and R. R. Fay), pp. 154-194. New York, NY: Springer.
- Kawasaki, M. (2009). Evolution of time-coding systems in weakly electric fishes. *Zoolog. Sci.* **26**, 587-599.
- Kishida, R., Goris, R. C., Nishizawa, H., Koyama, H., Kadota, T. and Amemiya, F. (1987). Primary neurons of the lateral line nerves and their central projections in hagfishes. *J. Comp. Neurol.* **264**, 303-310.
- Kuratani, S. and Horigome, N. (2000). Developmental morphology of branchiomergeric nerves in a cat shark, *Scyliorhinus torazame*, with special reference to rhombomeres, cephalic mesoderm, and distribution patterns of cephalic crest cells. *Zool. Sci.* **17**, 893-909.
- Lavoué, S. and Sullivan, J. P. (2004). Simultaneous analysis of five molecular markers provides a well-supported phylogenetic hypothesis for the living bony-tongue fishes (Osteoglossomorpha: Teleostei). *Mol. Phylogenet. Evol.* **33**, 171-185.
- Lavoué, S., Miya, M., Arnegard, M. E., Sullivan, J. P., Hopkins, C. D. and Nishida, M. (2012). Comparable ages for the independent origins of electrogenesis in African and South American weakly electric fishes. *PLoS ONE* **7**, e36287.
- Lissmann, H. W. (1951). Continuous electrical signals from the tail of a fish. *Gymnarchus niloticus* Cuv. *Nature* **167**, 201-202.
- Lissmann, H. W. (1958). On the function and evolution of electric organs in fish. *J. Exp. Biol.* **35**, 156-191.
- Lissmann, H. W. and Machin, K. E. (1958). The mechanism of object location in *Gymnarchus niloticus* and similar fish. *J. Exp. Biol.* **35**, 451-486.
- Lu, J. and Fishman, H. M. (1995). Ion channels and transporters in the electroreceptive ampullary epithelium from skates. *Biophys. J.* **69**, 2467-2475.
- Ma, E. Y. and Raible, D. W. (2009). Signaling pathways regulating zebrafish lateral line development. *Curr. Biol.* **19**, R381-R386.
- Mallatt, J. and Winchell, C. J. (2007). Ribosomal RNA genes and deuterostome phylogeny revisited: more cyclostomes, elasmobranchs, reptiles, and a brittle star. *Mol. Phylogenet. Evol.* **43**, 1005-1022.
- Maxwell, E. E., Fröbisch, N. B. and Heppleston, A. C. (2008). Variability and conservation in late chondrichthyan development: ontogeny of the winter skate (*Leucoraja ocellata*). *Anat. Rec.* **291**, 1079-1087.
- Modrell, M. S. and Baker, C. V. H. (2012). Evolution of electrosensory ampullary organs: conservation of *Eya4* expression during lateral line development in jawed vertebrates. *Evol. Dev.* **14**, 277-285.
- Modrell, M. S., Bemis, W. E., Northcutt, R. G., Davis, M. C. and Baker, C. V. H. (2011a). Electrosensory ampullary organs are derived from lateral line placodes in bony fishes. *Nat. Commun.* **2**, 496.
- Modrell, M. S., Buckley, D. and Baker, C. V. H. (2011b). Molecular analysis of neurogenic placode development in a basal ray-finned fish. *Genesis* **49**, 278-294.
- Münz, H., Claas, B. and Fritzsche, B. (1984). Electroreceptive and mechanoreceptive units in the lateral line of the axolotl *Ambystoma mexicanum*. *J. Comp. Physiol. A* **154**, 33-44.
- Murray, R. W. (1956). The response of the lateralis organs of *Xenopus laevis* to electrical stimulation by direct current. *J. Physiol.* **134**, 408-420.
- Near, T. J., Eytan, R. I., Dornburg, A., Kuhn, K. L., Moore, J. A., Davis, M. P., Wainwright, P. C., Friedman, M. and Smith, W. L. (2012). Resolution of ray-finned fish phylogeny and timing of diversification. *Proc. Natl. Acad. Sci. USA* **109**, 13698-13703.
- New, J. G. (1997). The evolution of vertebrate electrosensory systems. *Brain Behav. Evol.* **50**, 244-252.
- Nishikawa, S. and Sasaki, F. (1996). Internalization of styryl dye FM1-43 in the hair cells of lateral line organs in *Xenopus* larvae. *J. Histochem. Cytochem.* **44**, 733-741.
- Northcutt, R. G. (1986). Lungfish neural characters and their bearing on sarcopterygian phylogeny. *J. Morphol. Suppl.* **1**, 190, 277-297.
- Northcutt, R. G. (1997). Evolution of gnathostome lateral line ontogenies. *Brain Behav. Evol.* **50**, 25-37.
- Northcutt, R. G. (2003). Development of the lateral line system in the channel catfish. In *The Big Fish Bang. Proceedings of the 26th Annual Larval Fish Conference* (ed. H. I. Browman and A. B. Skiftesvik), pp. 137-159. Bergen, Norway: Institute of Marine Research.
- Northcutt, R. G. (2005). Ontogeny of electroreceptors and their neural circuitry. In *Electroreception* (ed. T. H. Bullock, C. D. Hopkins, A. N. Popper and R. R. Fay), pp. 112-131. New York, NY: Springer.
- Northcutt, R. G. and Bemis, W. E. (1993). Cranial nerves of the coelacanth, *Latimeria chalumnae* [Osteichthyes: Sarcopterygii: Actinistia], and comparisons with other craniata. *Brain Behav. Evol.* **42 Suppl.** **1**, 1-76.
- Northcutt, R. G., Catania, K. C. and Criley, B. B. (1994). Development of lateral line organs in the axolotl. *J. Comp. Neurol.* **340**, 480-514.
- Northcutt, R. G., Brändle, K. and Fritzsche, B. (1995). Electroreceptors and mechanosensory lateral line organs arise from single placodes in axolotls. *Dev. Biol.* **168**, 358-373.
- Northcutt, R. G., Holmes, P. H. and Albert, J. S. (2000). Distribution and innervation of lateral line organs in the channel catfish. *J. Comp. Neurol.* **421**, 570-592.
- O'Neill, P., McCole, R. B. and Baker, C. V. H. (2007). A molecular analysis of neurogenic placode and cranial sensory ganglion development in the shark, *Scyliorhinus canicula*. *Dev. Biol.* **304**, 156-181.
- Ota, K. G., Fujimoto, S., Oisi, Y. and Kuratani, S. (2011). Identification of vertebral-like elements and their possible differentiation from sclerotomes in the hagfish. *Nat. Commun.* **2**, 373.
- Pettigrew, J. D. (1999). Electroreception in monotremes. *J. Exp. Biol.* **202**, 1447-1454.
- Richardson, M. K. and Wright, G. M. (2003). Developmental transformations in a normal series of embryos of the sea lamprey *Petromyzon marinus* (Linnaeus). *J. Morphol.* **257**, 348-363.
- Ronan, M. (1988). Anatomical and physiological evidence for electroreception in larval lampreys. *Brain Res.* **448**, 173-177.
- Ronan, M. C. and Bodznick, D. (1986). End buds: non-ampullary electroreceptors in adult lampreys. *J. Comp. Physiol. A* **158**, 9-15.
- Roth, A. (2003). Development of catfish lateral line organs: electroreceptors require innervation, although mechanoreceptors do not. *Naturwissenschaften* **90**, 251-255.
- Sahly, I., Andermann, P. and Petit, C. (1999). The zebrafish *eya1* gene and its expression pattern during embryogenesis. *Dev. Genes Evol.* **209**, 399-410.
- Sarrazin, A. F., Nuñez, V. A., Sapède, D., Tassin, V., Dambly-Chaudière, C. and Ghysen, A. (2010). Origin and early development of the posterior lateral line system of zebrafish. *J. Neurosci.* **30**, 8234-8244.
- Schlosser, G. (2002). Development and evolution of lateral line placodes in amphibians. II. Evolutionary diversification. *Zoology* **105**, 177-193.
- Schlosser, G. (2008). Do vertebrate neural crest and cranial placodes have a common evolutionary origin? *Bioessays* **30**, 659-672.
- Schlosser, G. and Ahrens, K. (2004). Molecular anatomy of placode development in *Xenopus laevis*. *Dev. Biol.* **271**, 439-466.
- Steven, D. M. (1951). Sensory cells and pigment distribution in the tail of the ammocoete. *J. Microsc. Sci.* **92**, 233-247.
- Sullivan, J. P., Lavoué, S. and Hopkins, C. D. (2000). Molecular systematics of the African electric fishes (Mormyroidae: Teleostei) and a model for the evolution of their electric organs. *J. Exp. Biol.* **203**, 665-683.
- Teeter, J. H., Szamier, R. B. and Bennett, M. V. L. (1980). Ampullary electroreceptors in the sturgeon *Scaphirhynchus platyrhynchus* (Rafinesque). *J. Comp. Physiol. A* **138**, 213-223.
- Tong, S. L. and Bullock, T. H. (1984). Physiological properties of the electro- and mechanoreceptors in catfish *Ictalurus nebulosus*. *Sci. Sin.* **B 27**, 1023-1028.
- Vischer, H. A. (1989). The development of lateral-line receptors in *Eigenmannia* (Teleostei, Gymnotiformes). II. The electroreceptive lateral-line system. *Brain Behav. Evol.* **33**, 223-236.
- Vischer, H. A., Lannoo, M. J. and Heiligenberg, W. (1989). Development of the electrosensory nervous system in *Eigenmannia* (Gymnotiformes): I. The peripheral nervous system. *J. Comp. Neurol.* **290**, 16-40.
- von der Emde, G. (2006). Non-visual environmental imaging and object detection through active electrolocation in weakly electric fish. *J. Comp. Physiol. A* **192**, 601-612.
- von der Emde, G. (1999). Active electrolocation of objects in weakly electric fish. *J. Exp. Biol.* **202**, 1205-1215.
- Wang, Z., Gerstein, M. and Snyder, M. (2009). RNA-Seq: a revolutionary tool for transcriptomics. *Nat. Rev. Genet.* **10**, 57-63.
- Weisleder, P., Lu, Y. and Zakon, H. H. (1994). Effects of denervation upon receptor cell survival and basal cell proliferation in tuberous electroreceptor organs of a weakly electric fish. *J. Comp. Neurol.* **347**, 545-552.
- Weisleder, P., Lu, Y. and Zakon, H. H. (1996). Tuberous electroreceptor organs form in denervated regenerating skin of a weakly electric fish. *J. Comp. Neurol.* **367**, 563-574.
- Whitear, M. and Lane, E. B. (1983). Multivillous cells: epidermal sensory cells of unknown function in lamprey skin. *J. Zool.* **201**, 259-272.
- Wicht, H. and Northcutt, R. G. (1995). Ontogeny of the head of the Pacific hagfish (*Eptatretus stouti*, Myxinoidea): development of the lateral line system. *Philos. Trans. R. Soc. B* **349**, 119-134.
- Zupanc, G. K. H. and Bullock, T. H. (2005). From electrogenesis to electroreception: an overview. In *Electroreception* (ed. T. H. Bullock, C. D. Hopkins, A. N. Popper and R. R. Fay), pp. 5-46. New York, NY: Springer.
